# Supplementary material for: Cope's Rule in a modular organism: Directional evolution without an overarching macroevolutionary trend
Source: PubMed Central journal article supplement (PMC6771556; doi:10.1111/evo.13800), 2019-07-23
Supplement: EVO-73-1863-s001.pdf [file EVO-73-1863-s001.pdf]

### preAlbian

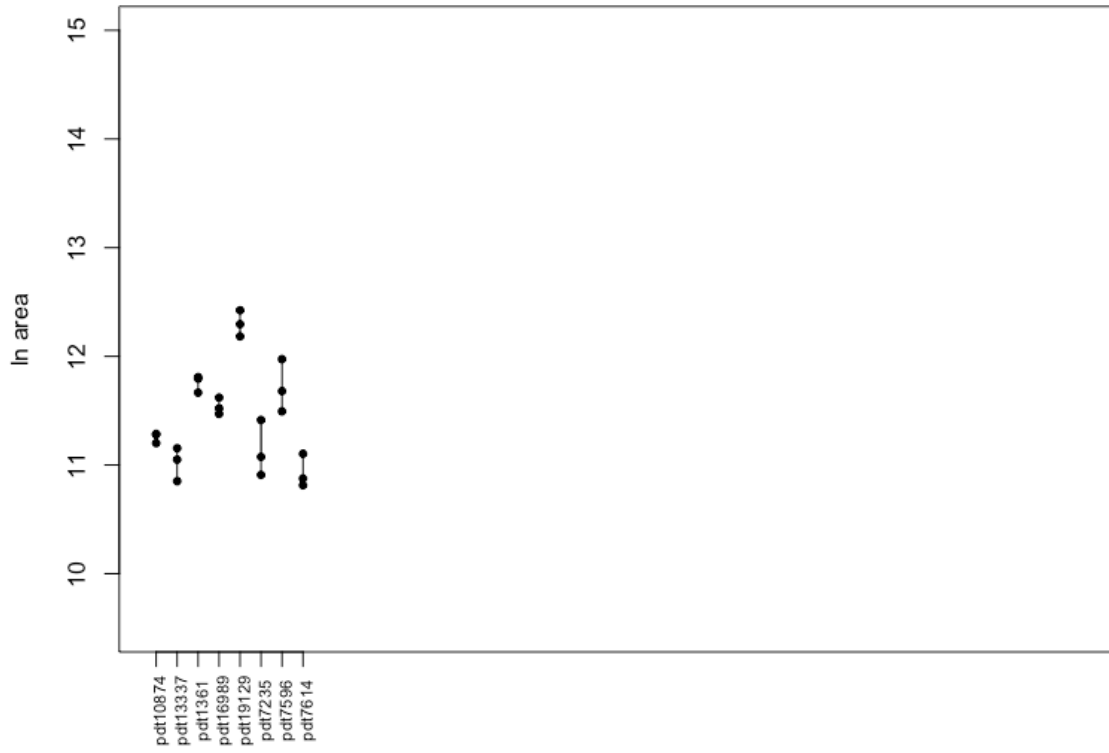

25

### Albian

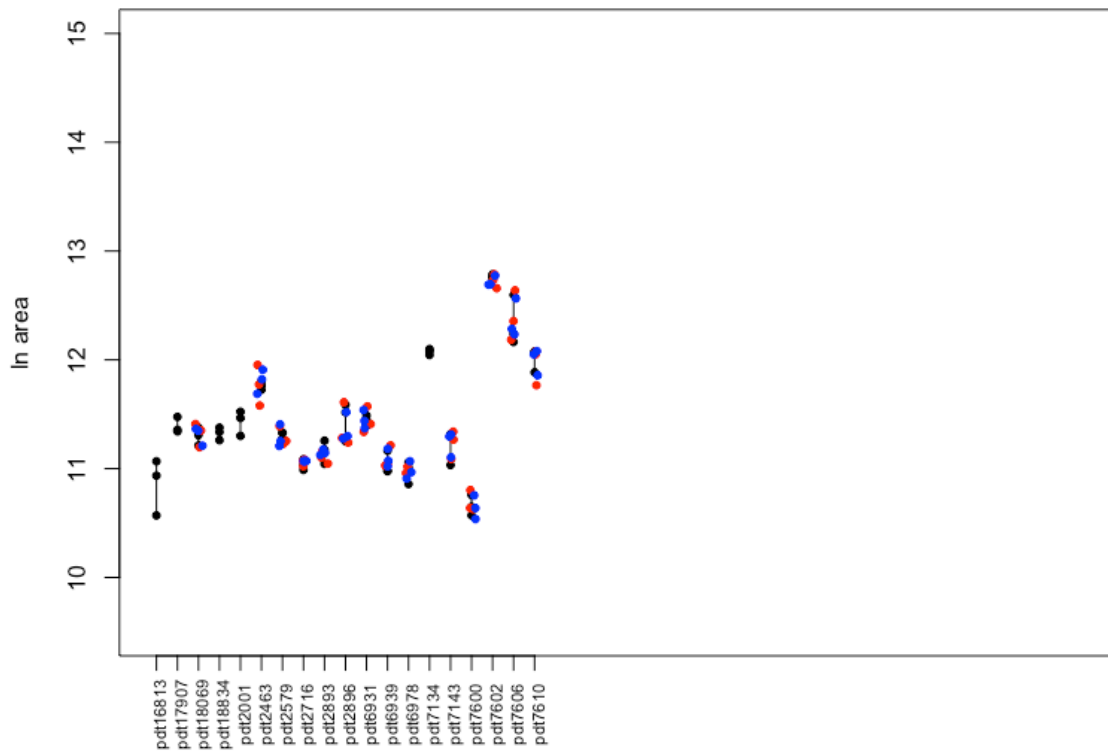

26

### Cenomanian

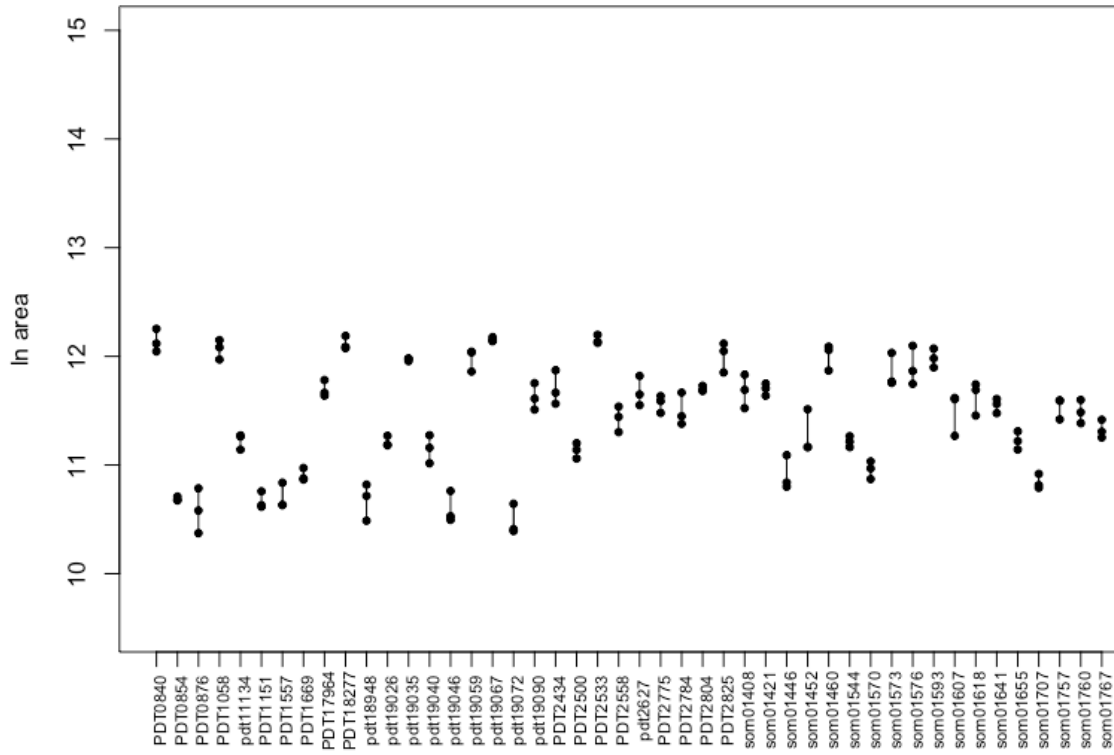

27

### Cenomanian

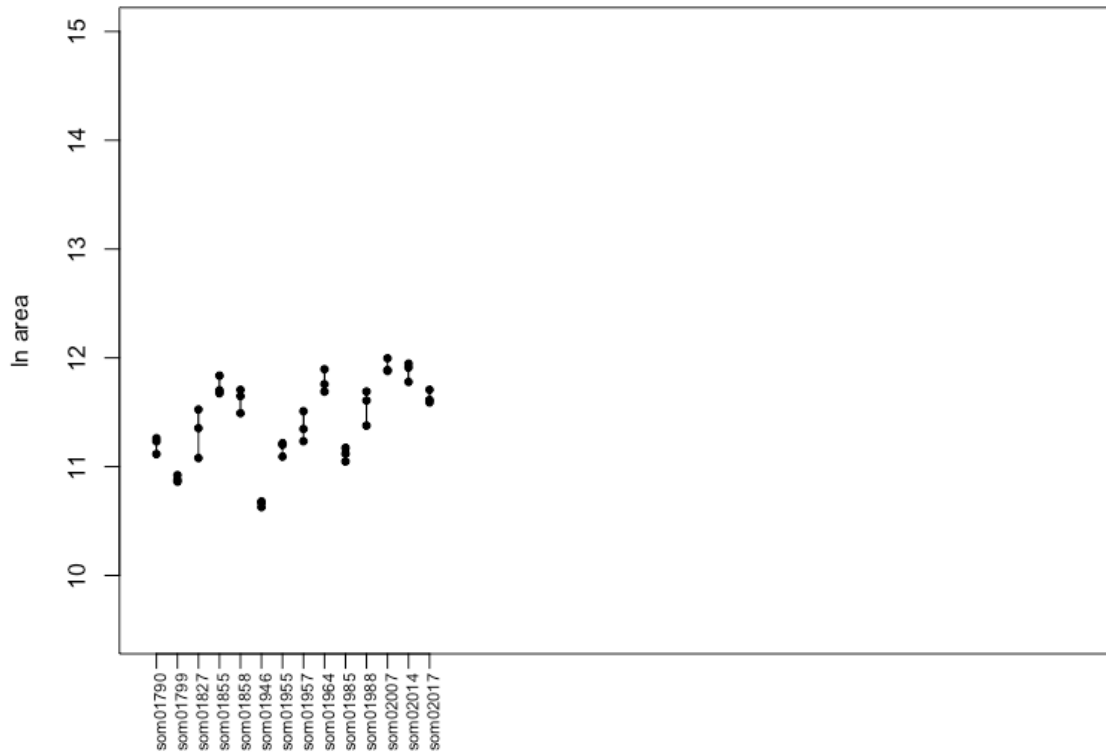

28

### Turonian

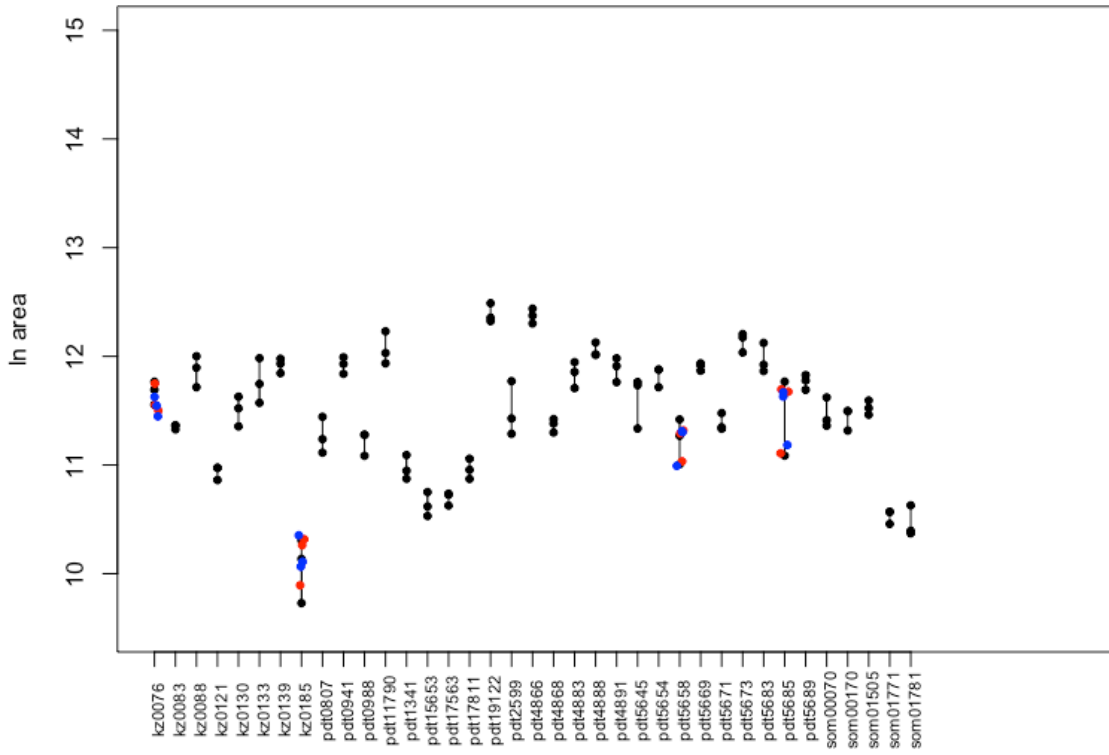

29

### Coniacian

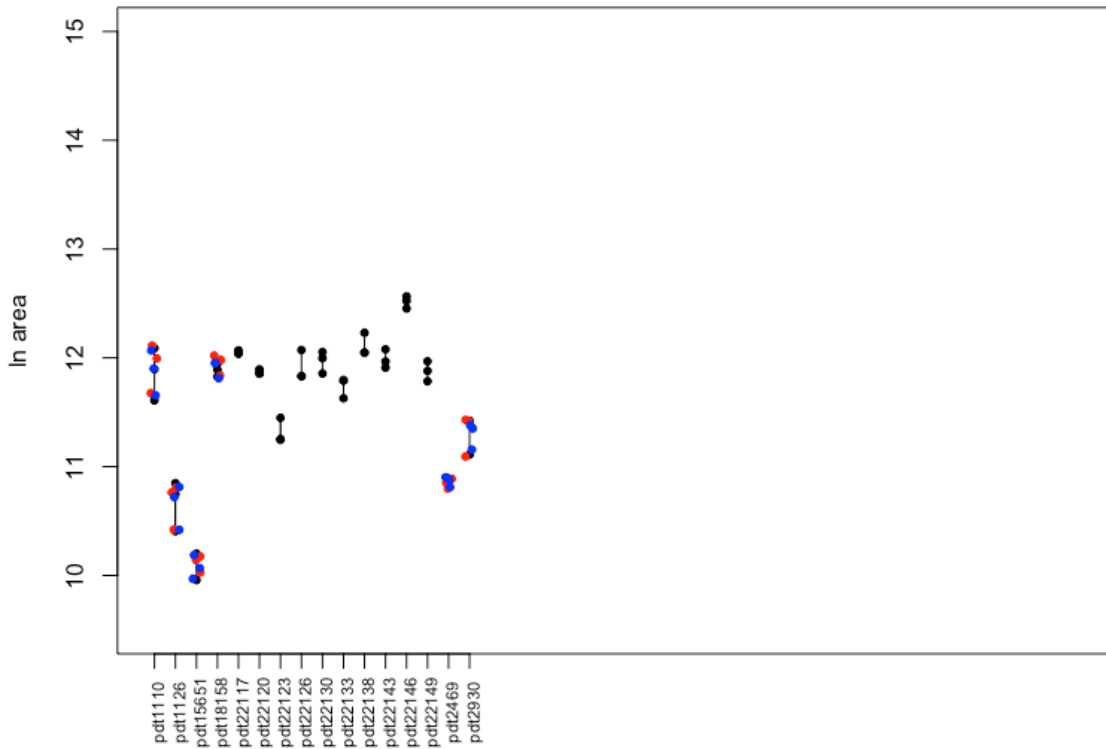

30

### Santonian

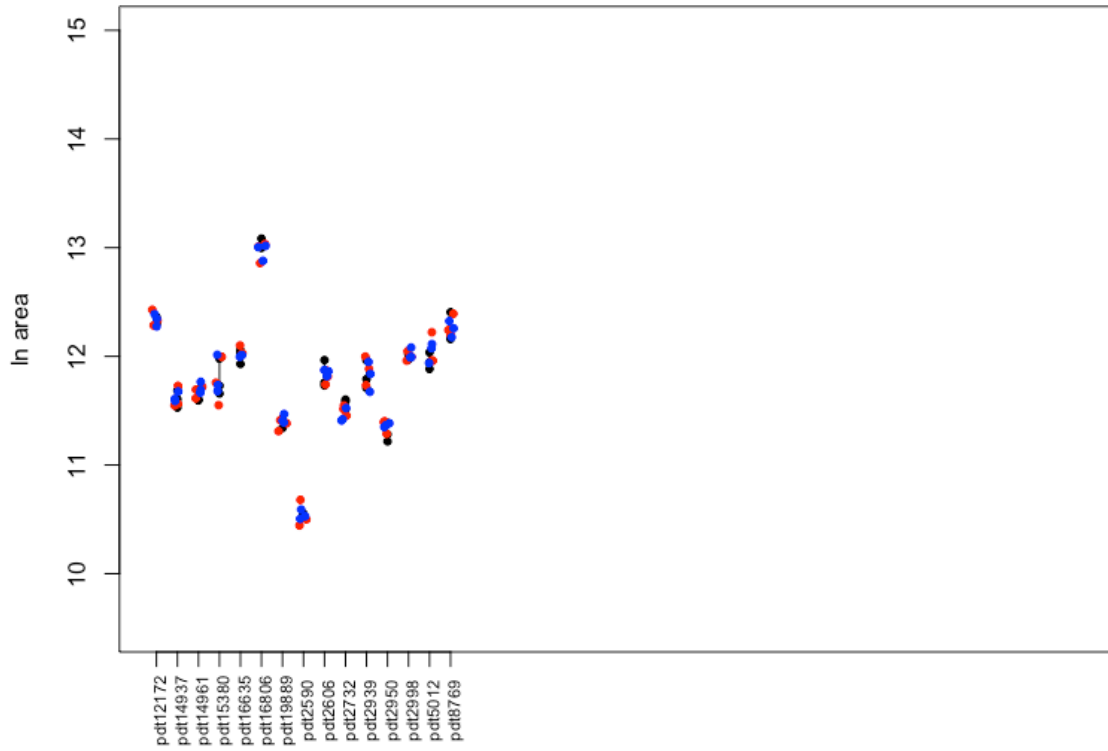

31

### Campanian

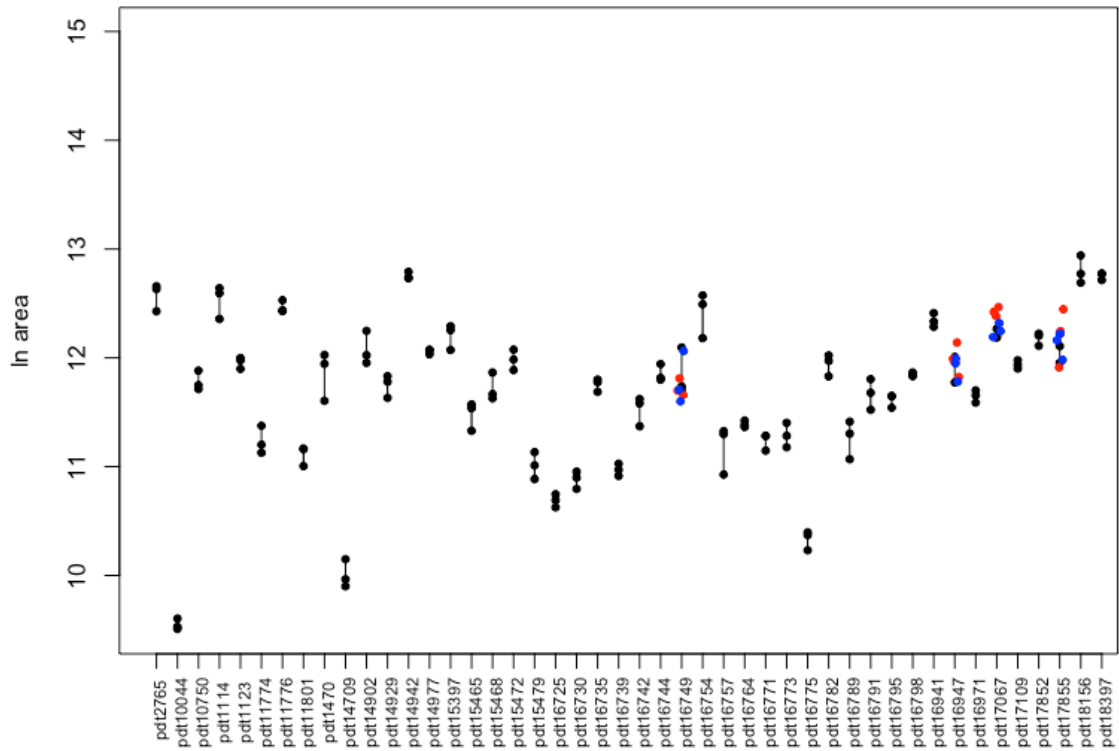

32

### Campanian

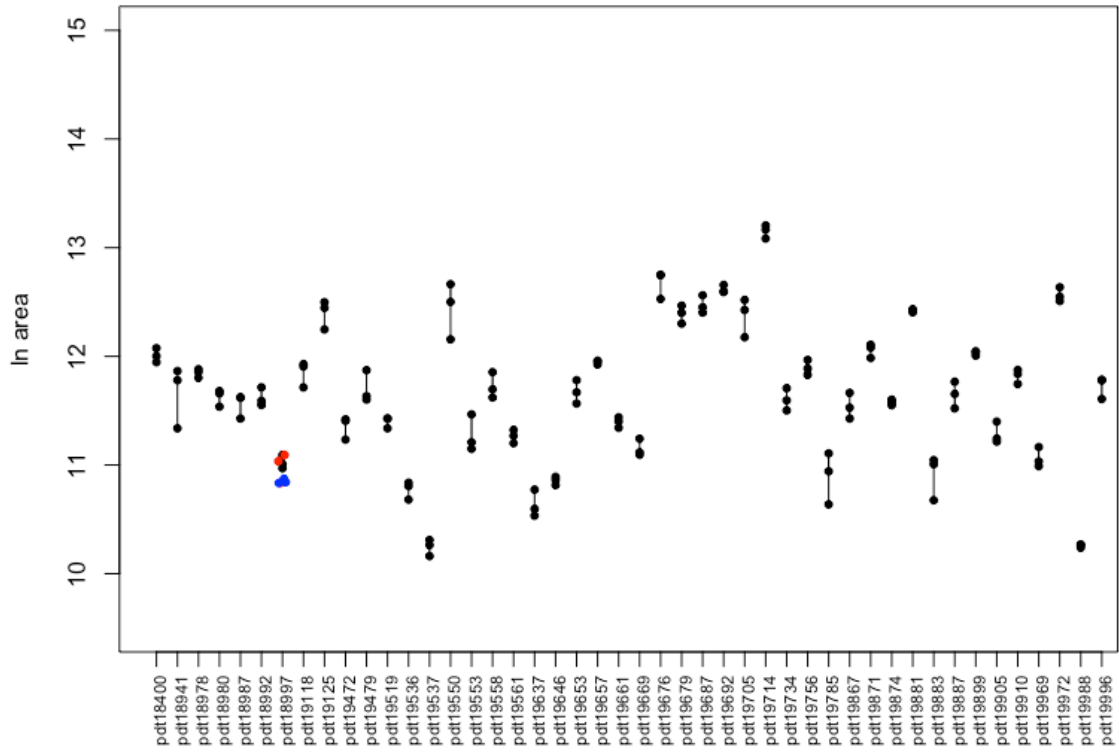

33

### Campanian

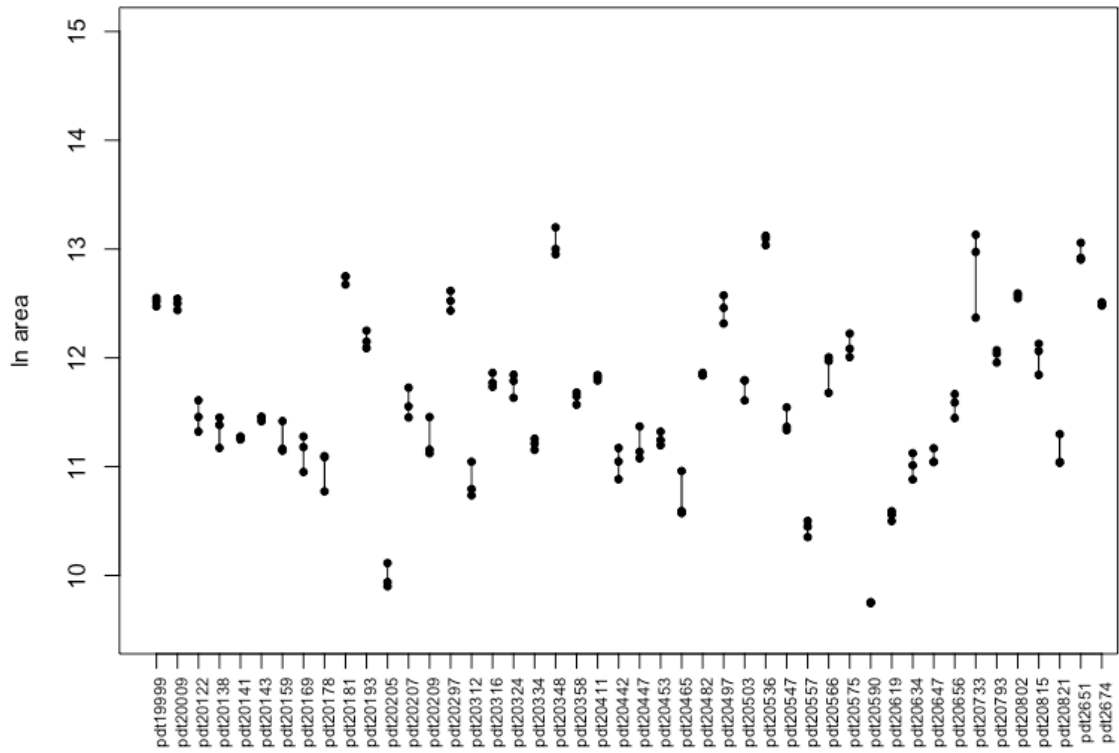

34

### Campanian

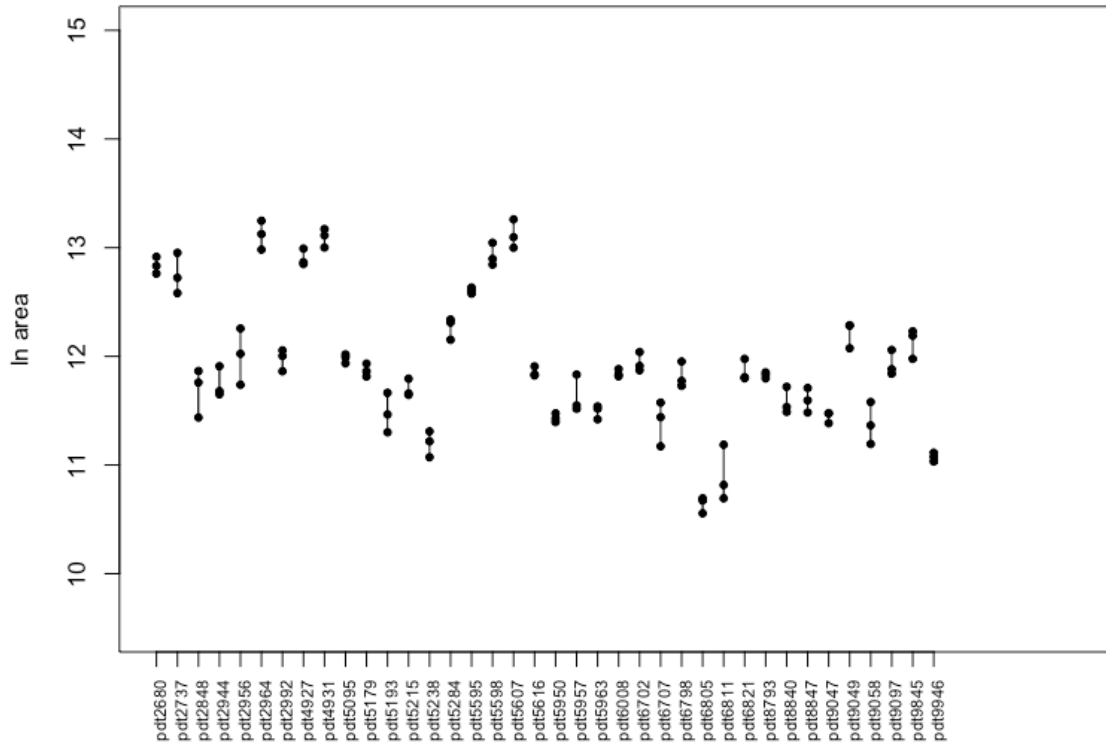

35

### Maastrichtian

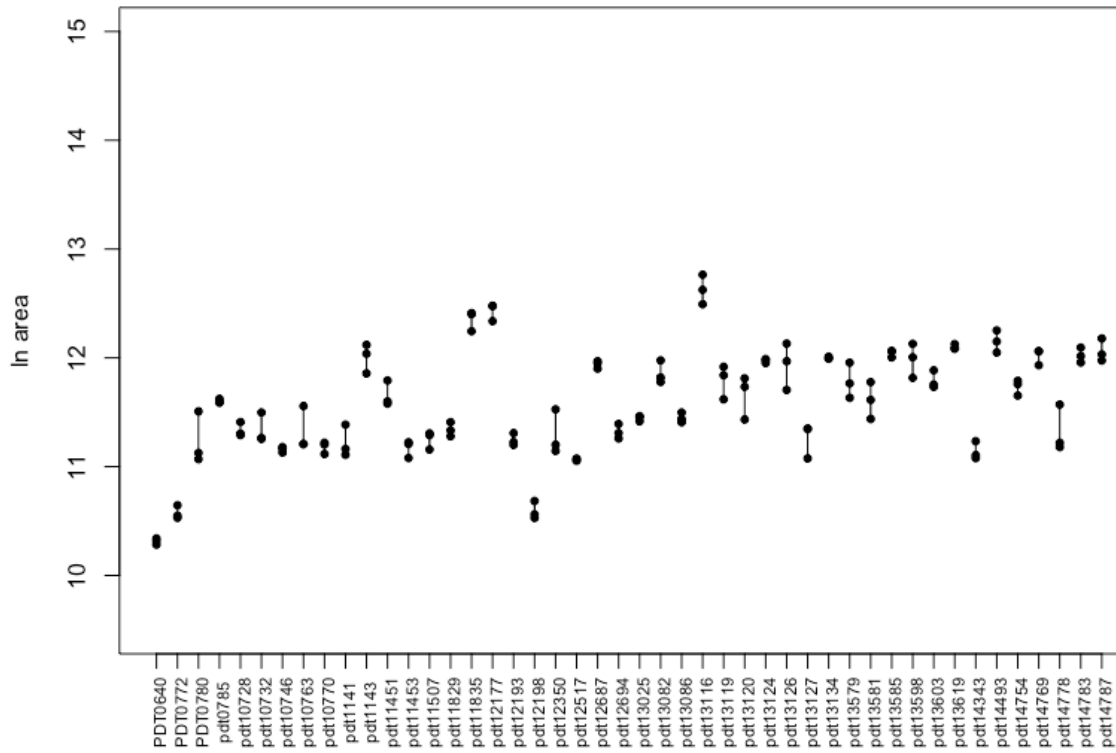

36

### Maastrichtian

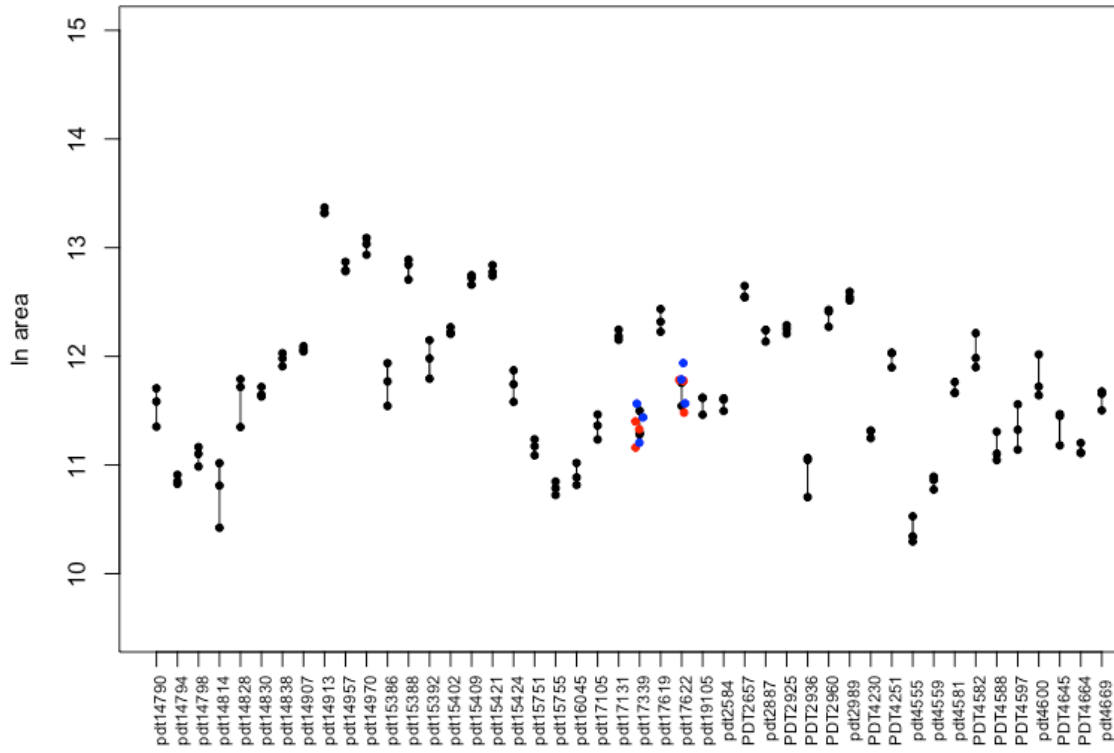

37

### Maastrichtian

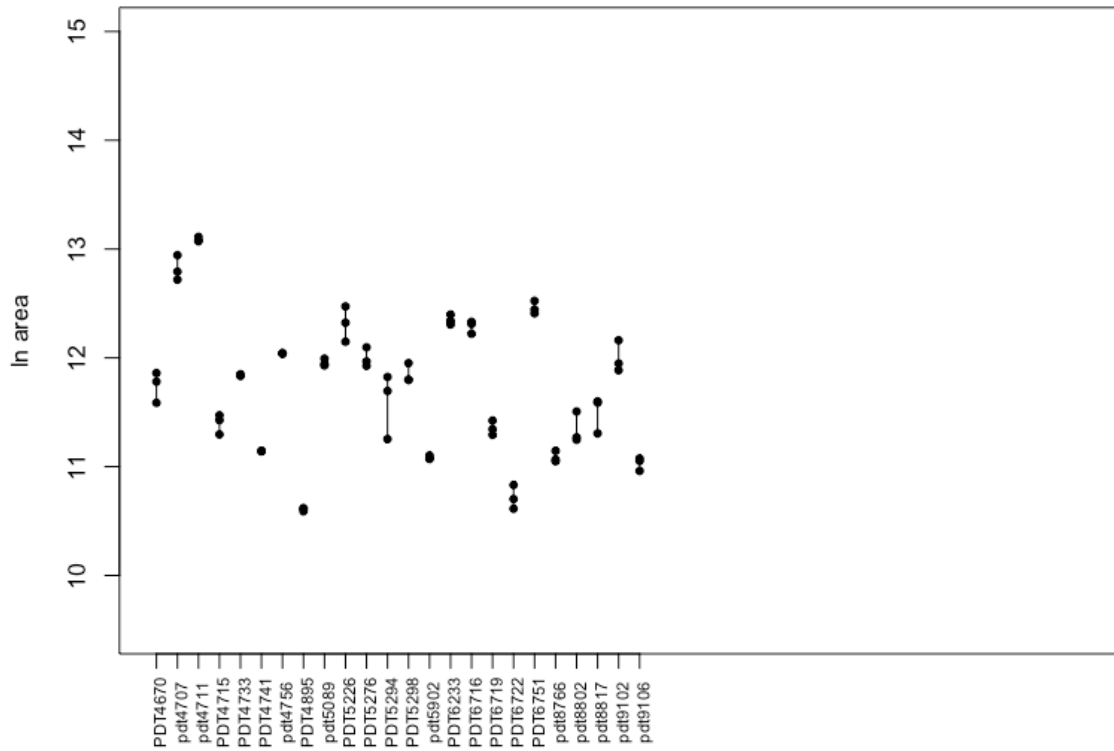

38



# Paleocene

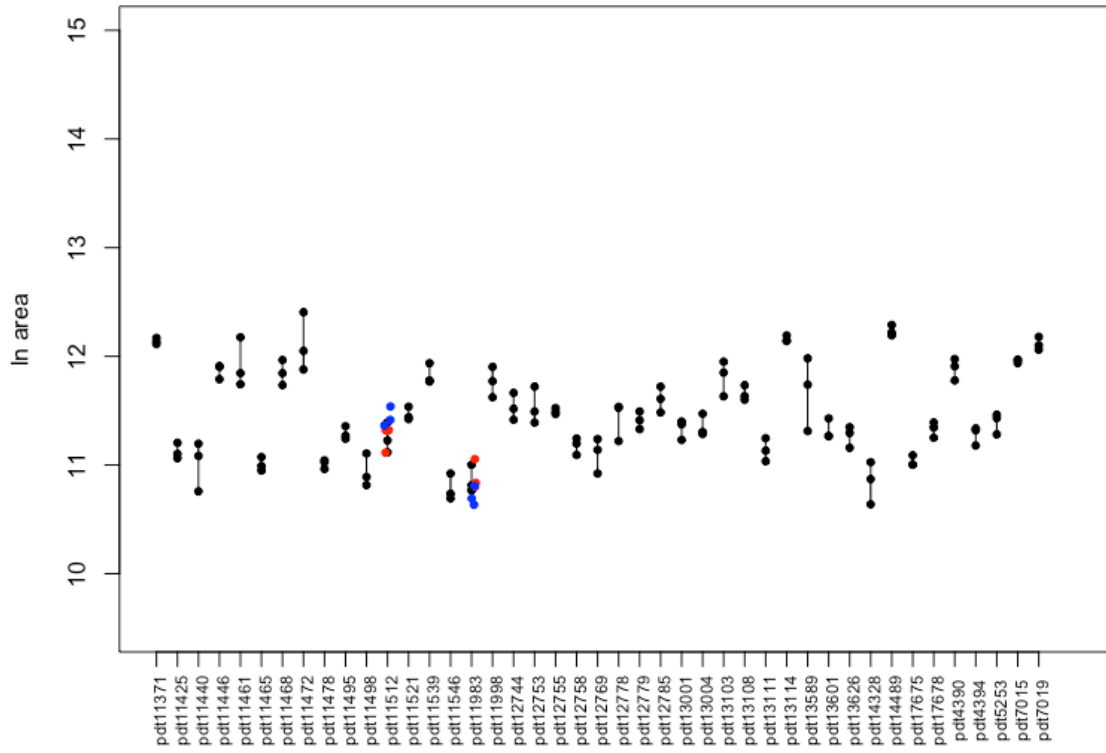

### Eocene

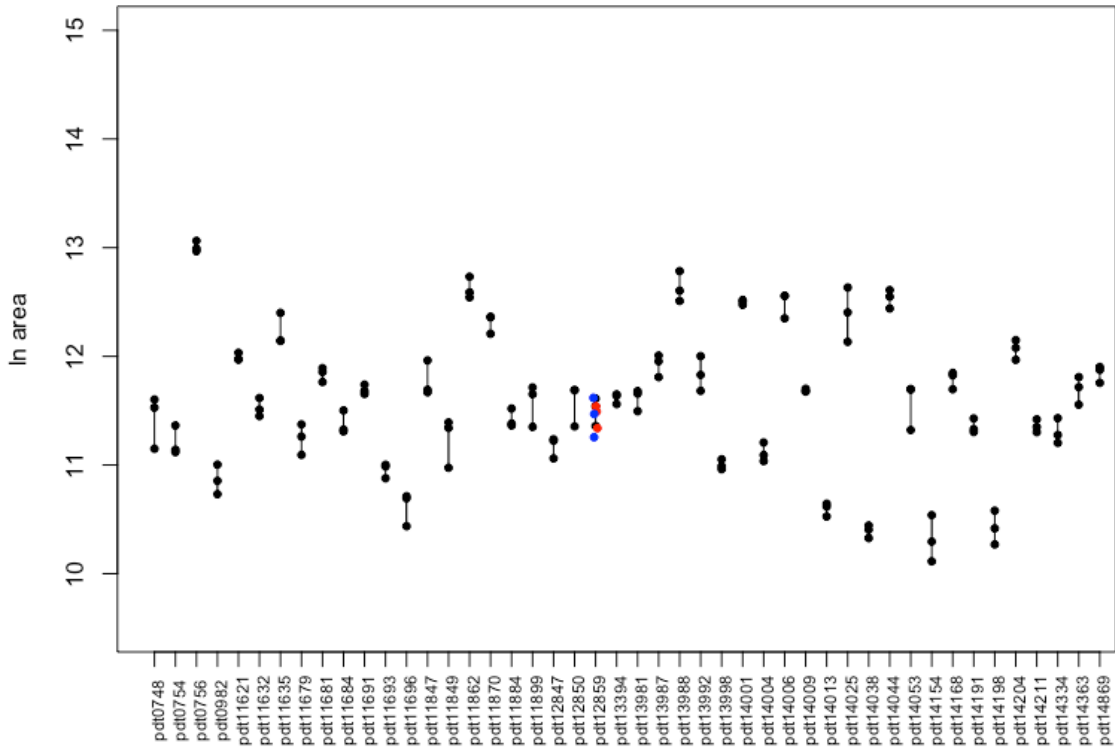

40

### Eocene

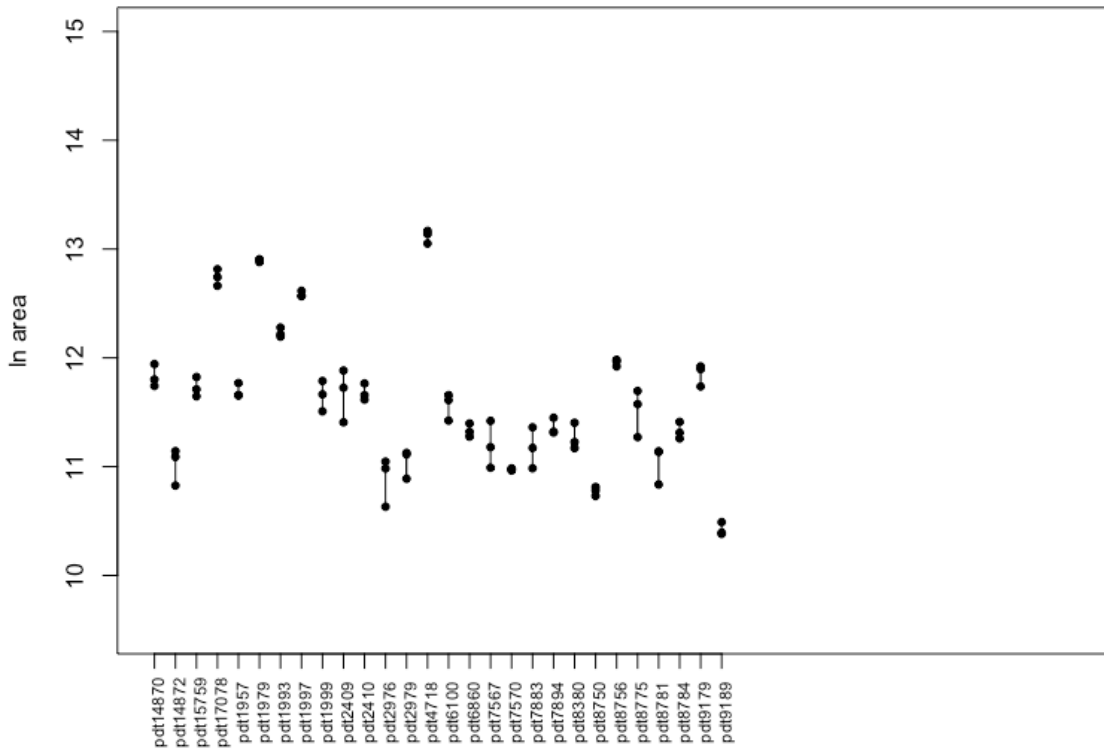

41

### Oligocene

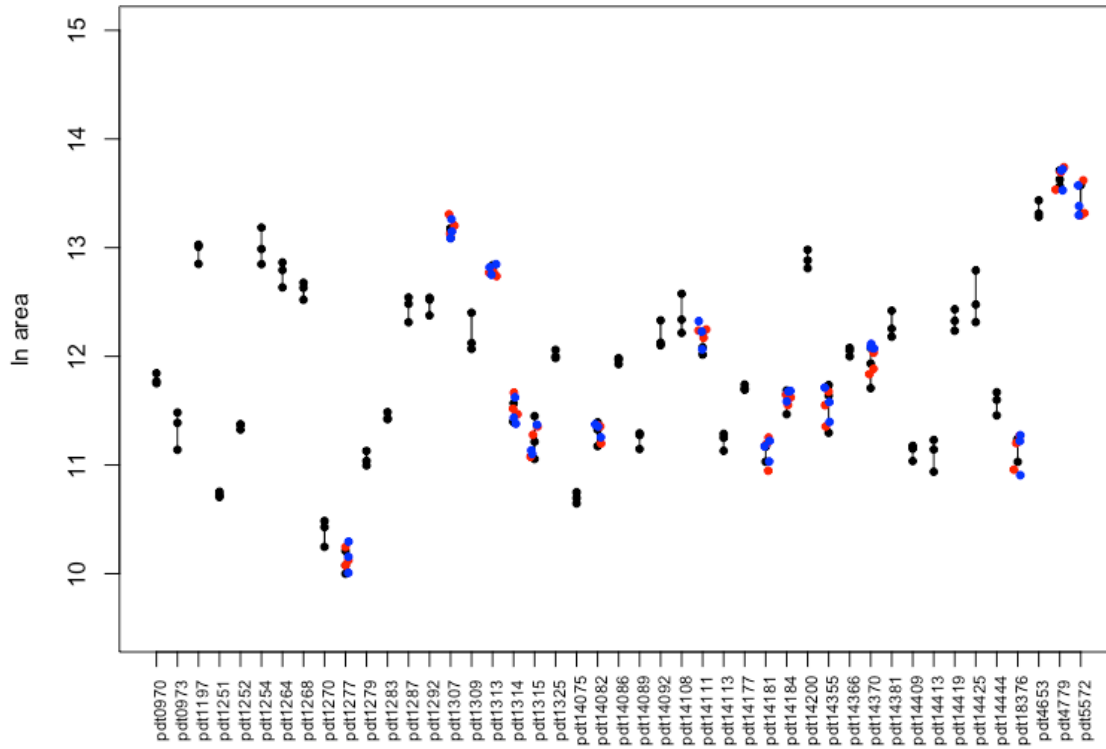

42

### Miocene

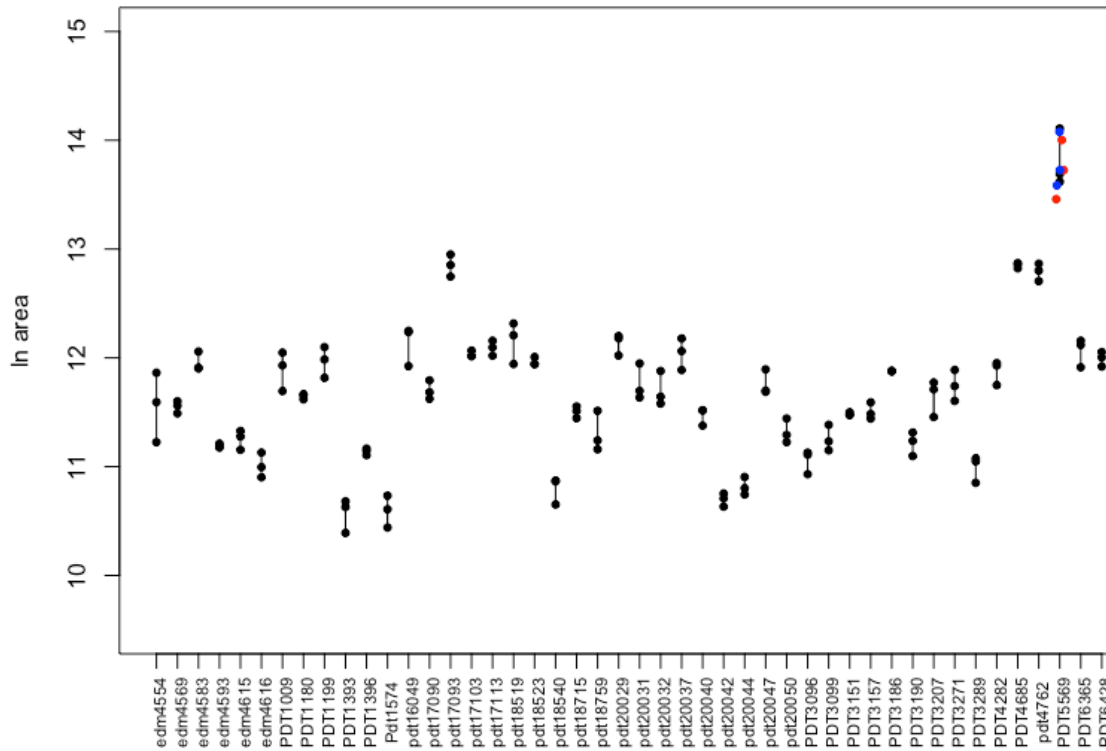

43

### Miocene

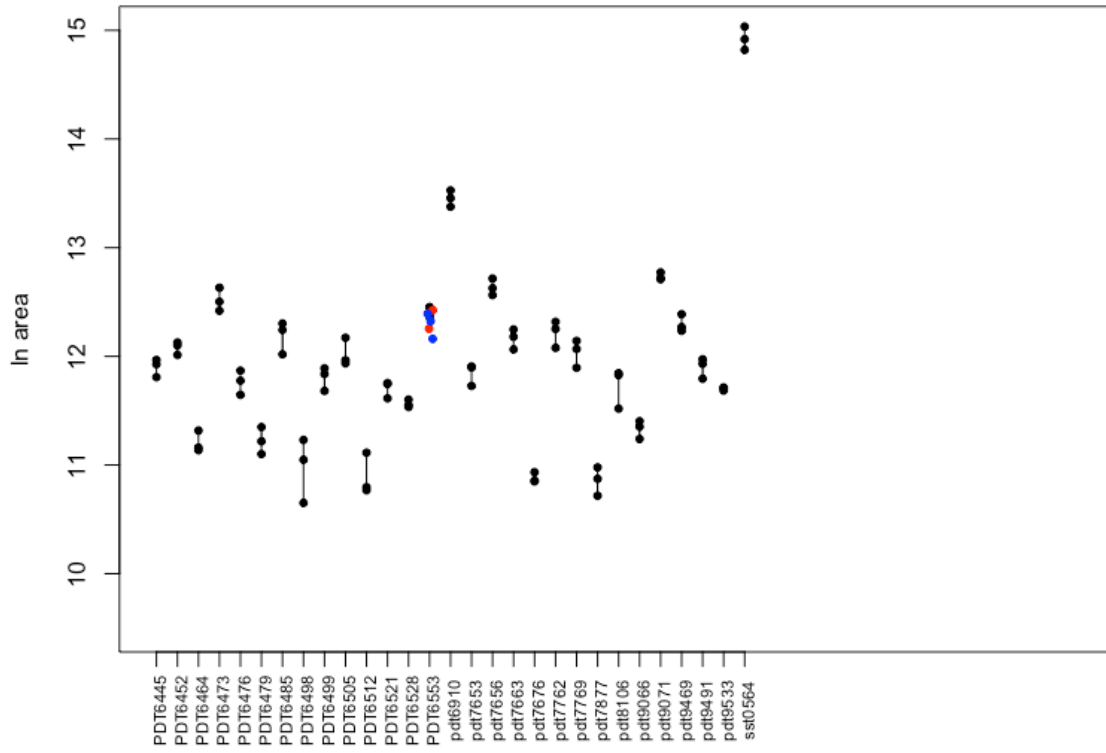

44

### Pliocene

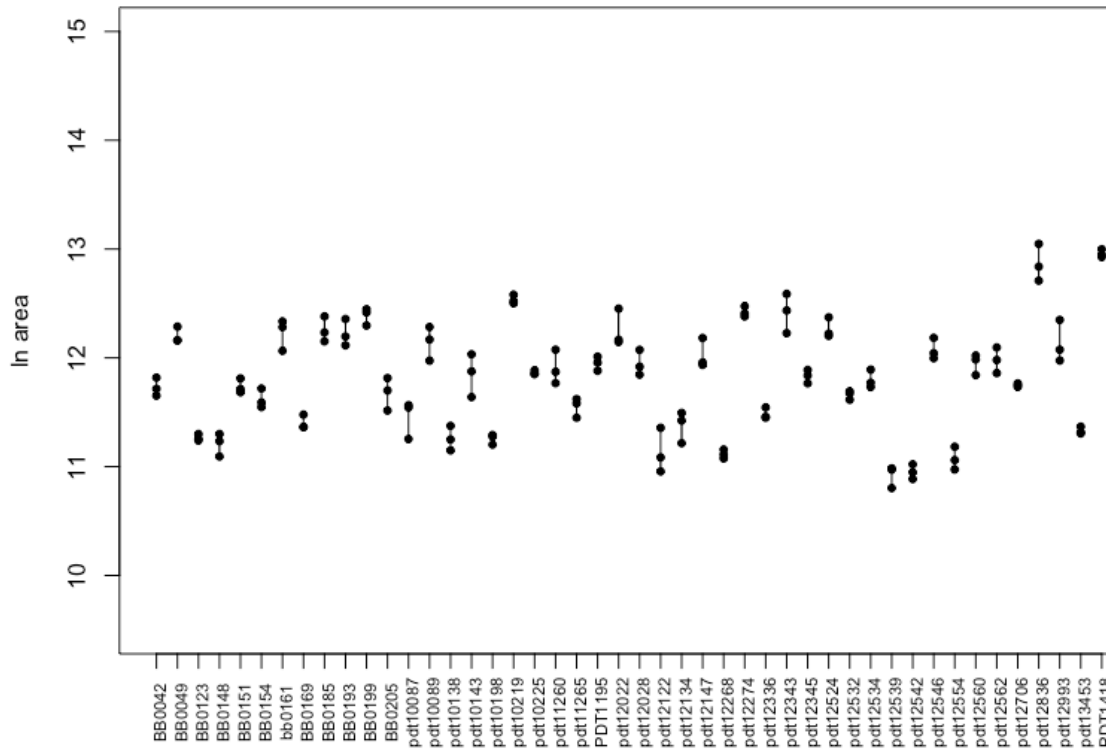

45

### Pliocene

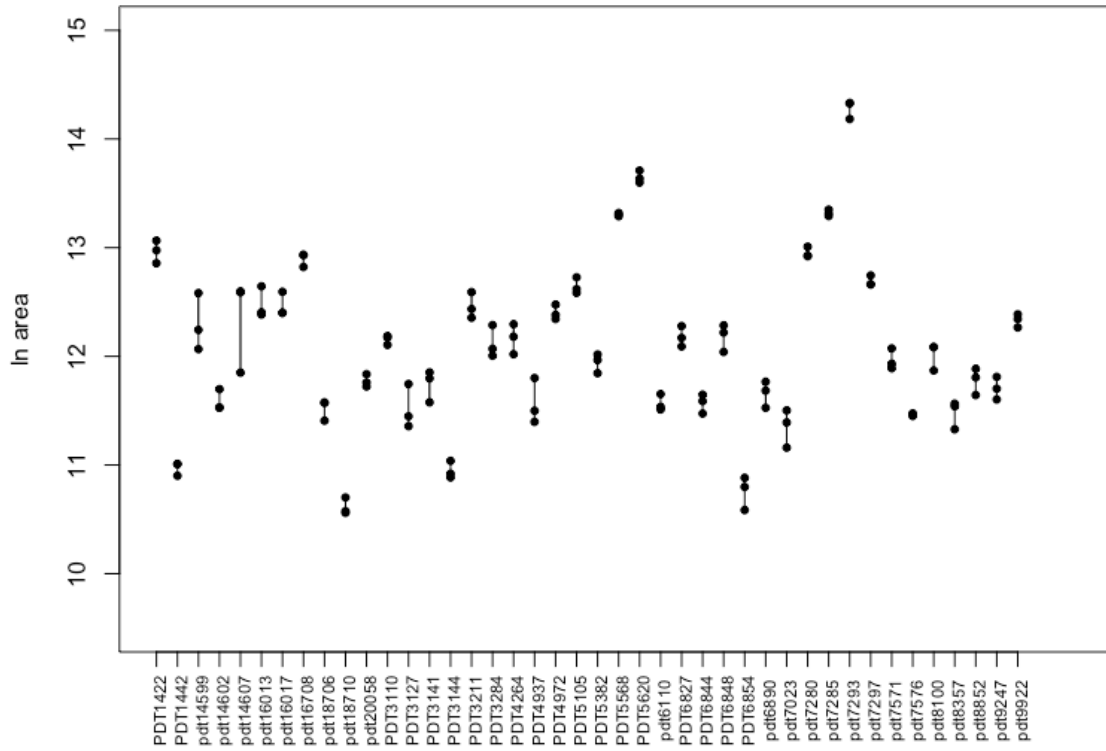

46

### Pleistocene

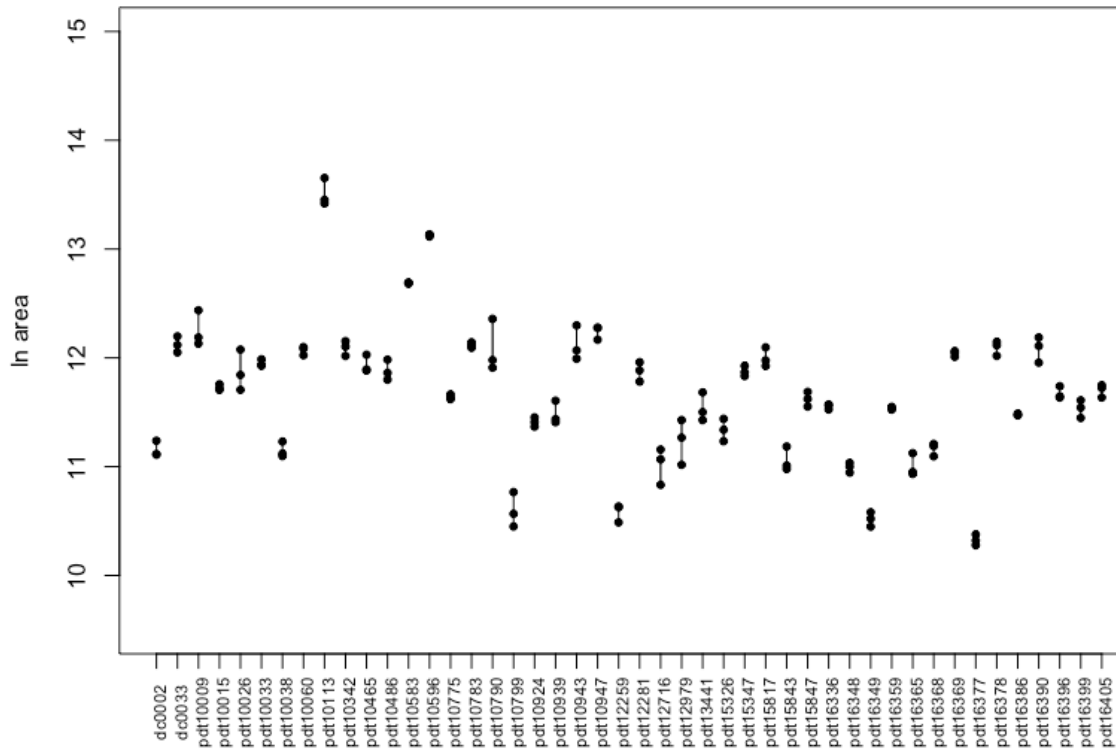

47

### Pleistocene

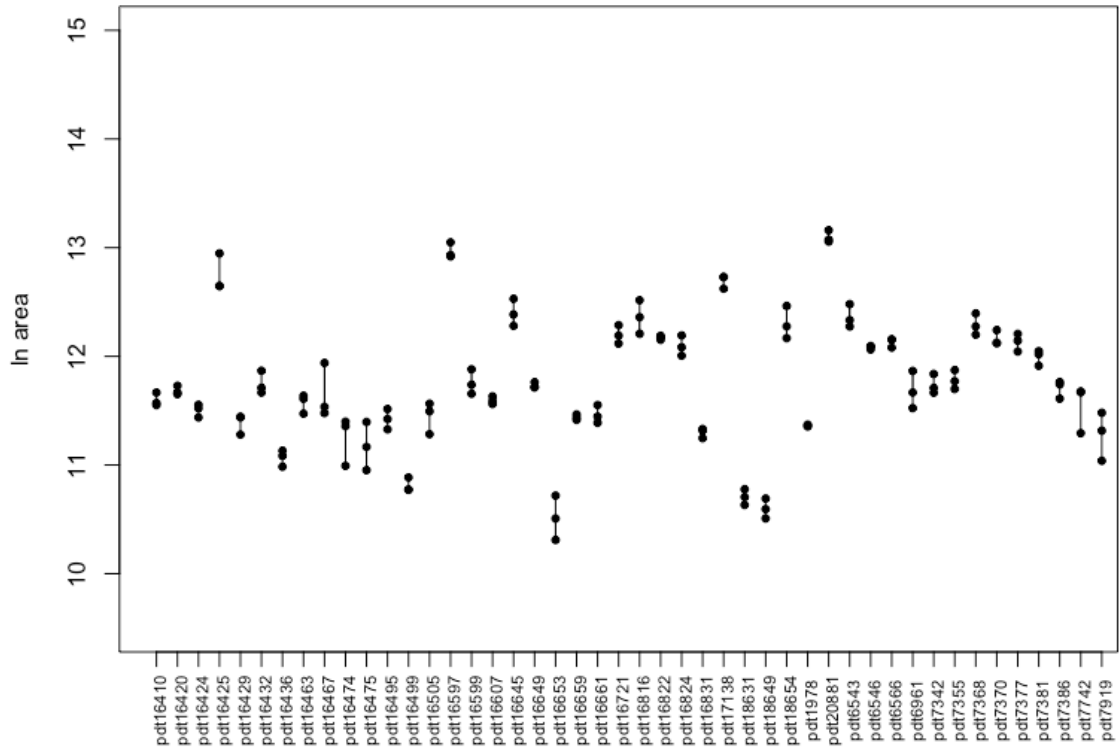

48

### Pleistocene

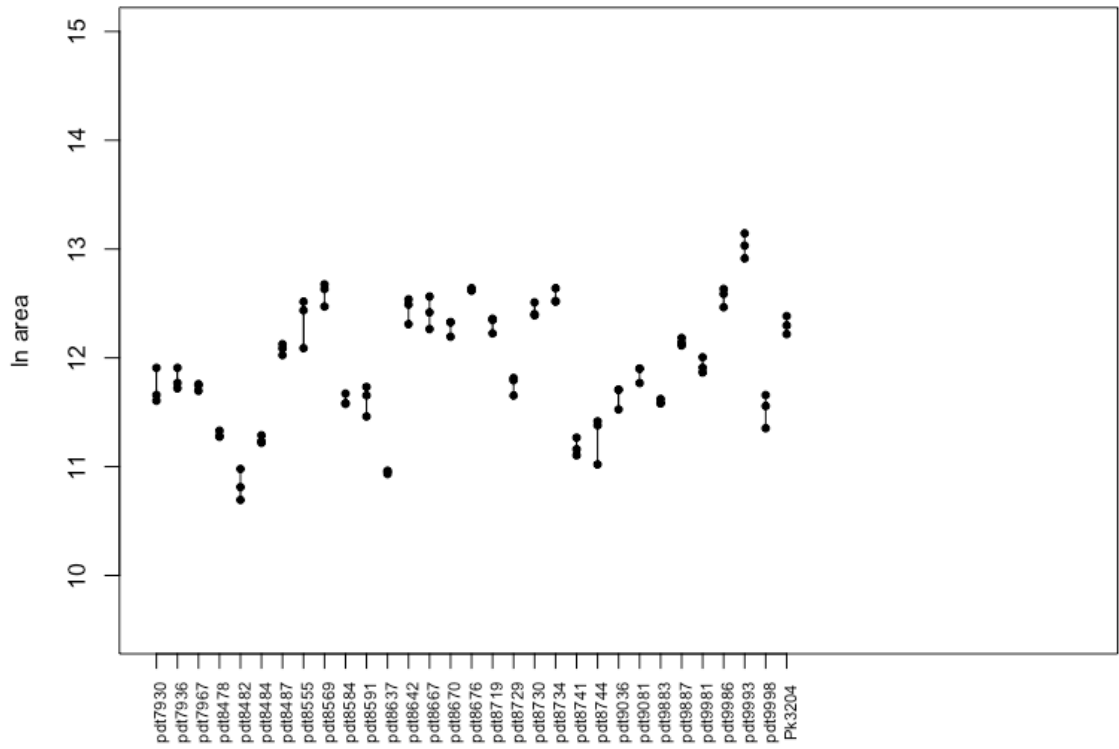

49

### Recent

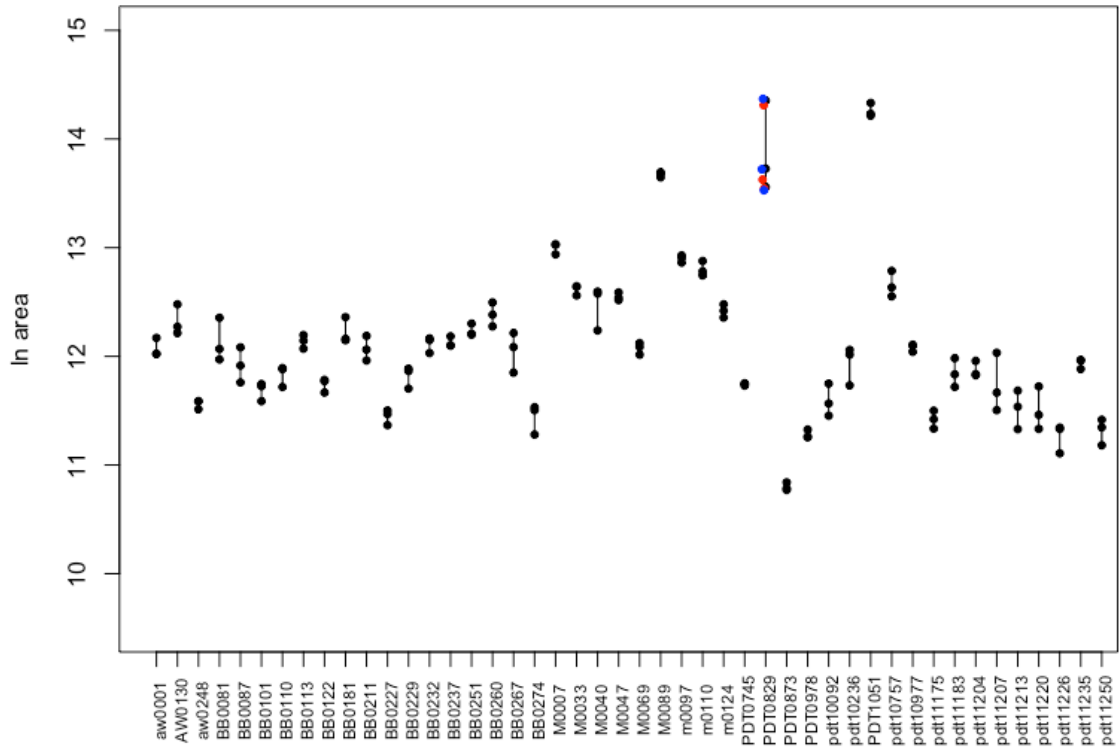

50

### Recent

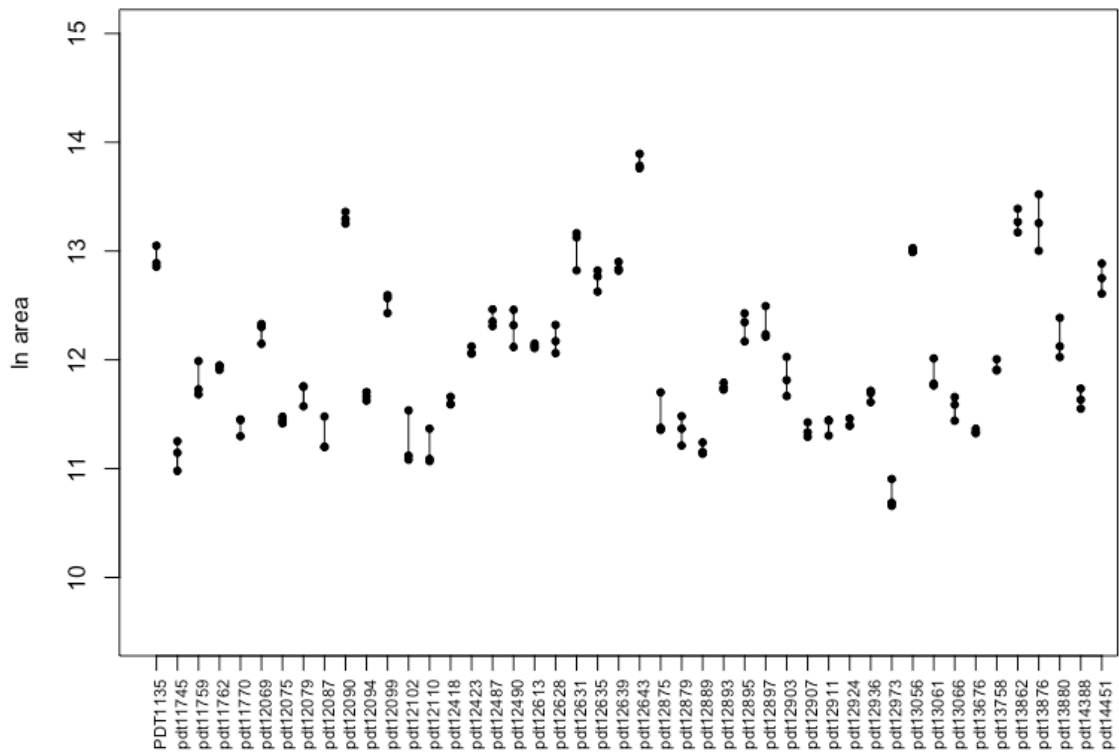

51

Recent

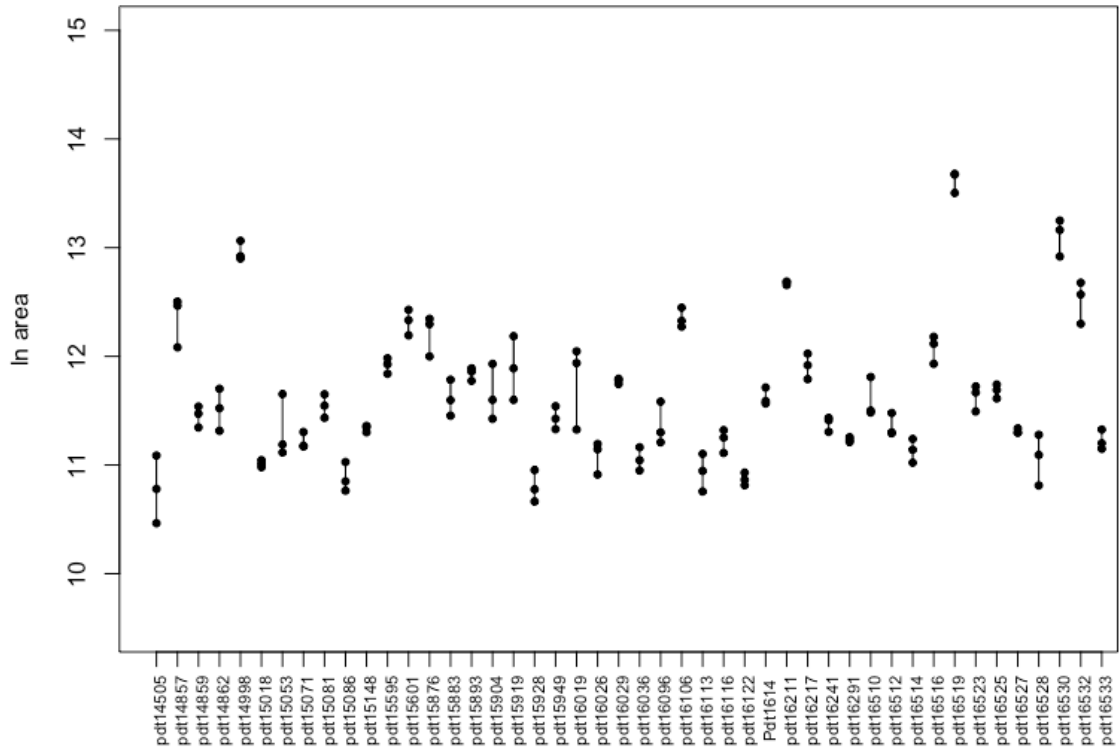

52

Recent

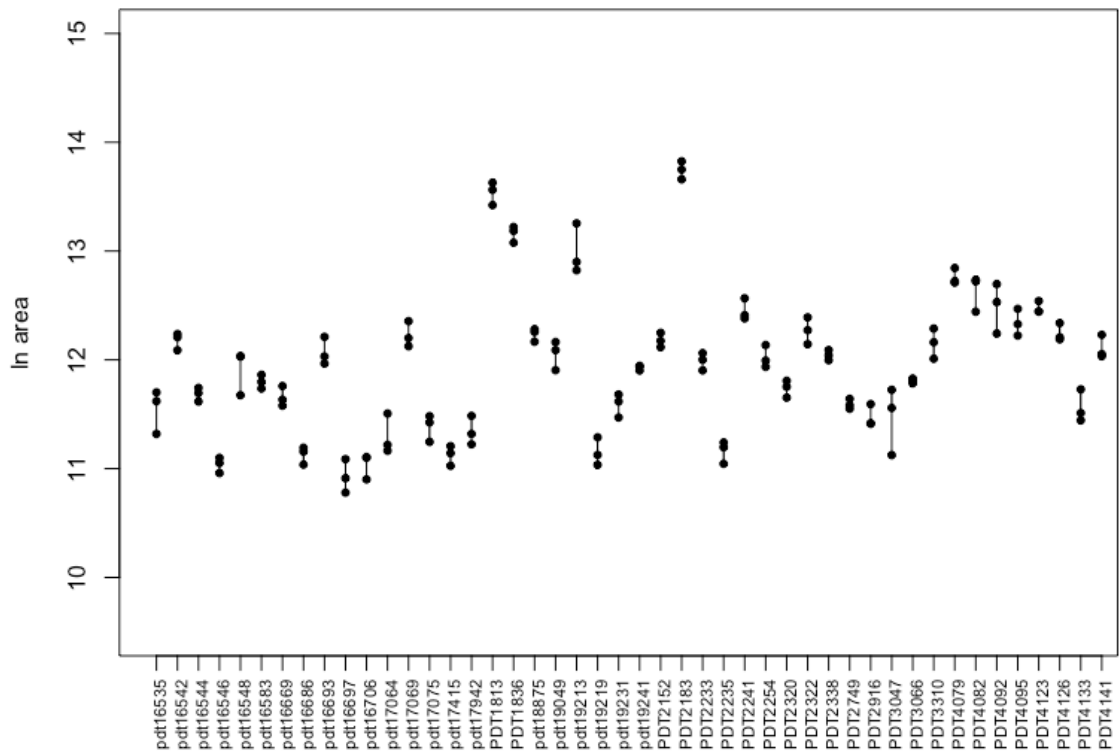

53



Recent

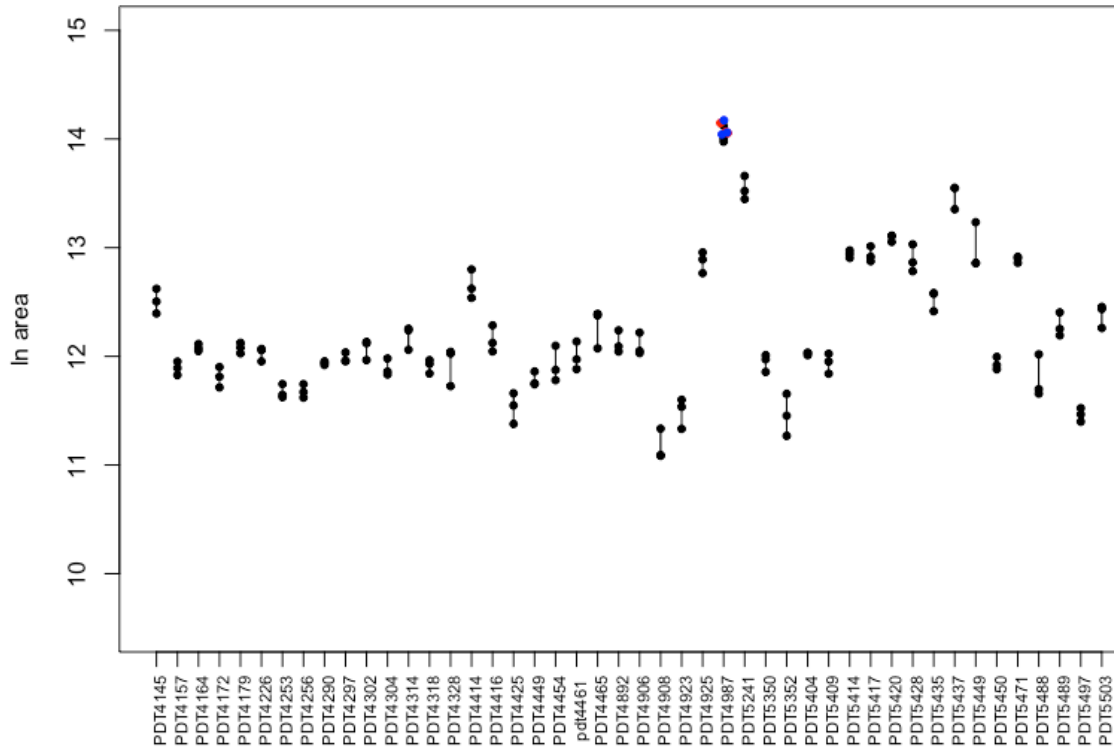

54

Recent

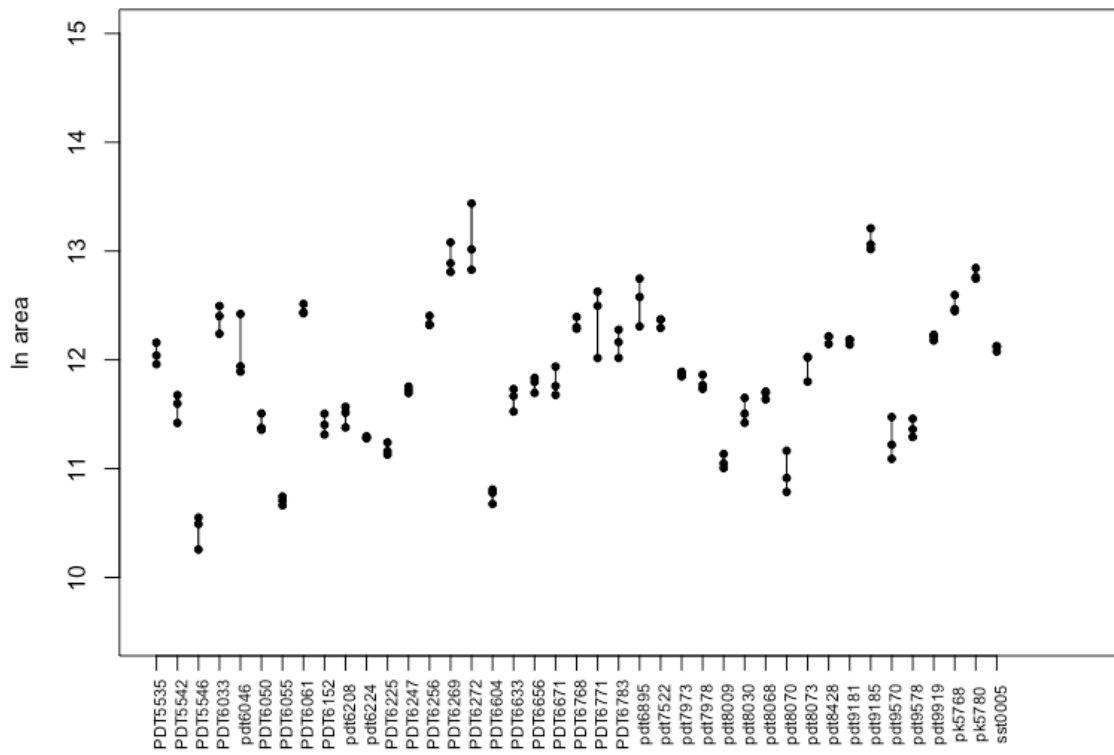

55

56 **Fig. S2. Length, width, area relationships.** Each point represents a measurement of a zooid  
57 (natural logged in  $\mu\text{m}$  or  $\mu\text{m}^2$ ), from only the first measurement of any species ( $N = 3504$ ).  
58 Zooid areas are square-rooted to reduce it to one dimension, except in the last panel. Red  
59 lines are fitted linear models and r.sq are adjusted r-squared values from the linear fit. Note  
60 that both length and width are reasonable proxies for area, but that length and width do not  
61 correlate well with each other. However, length times width is a good proxy for area  
62 (adjusted r-square = 0.958).  
63

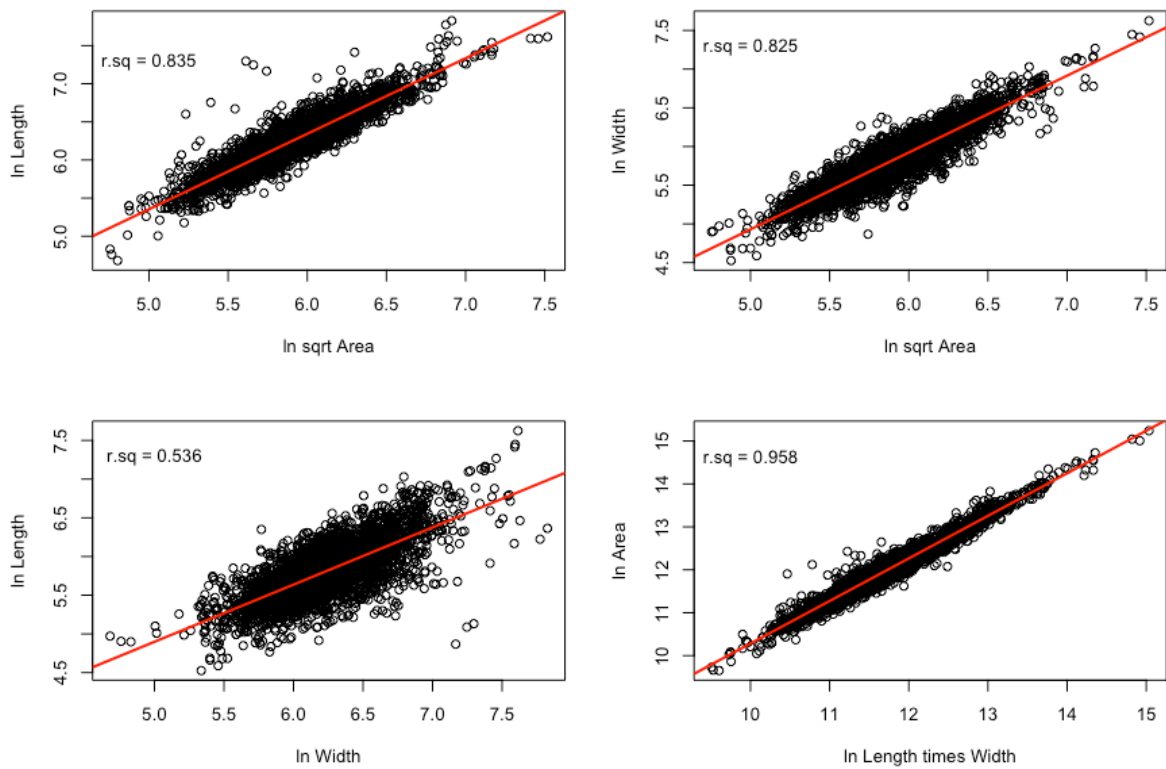

64

65 **Fig. S3. Distribution of ln zooid area.** A histogram showing the species means of all 1168  
66 species. The grand median is 11.74 (plotted in blue) while the grand mean is 11.76  $\mu\text{m}^2$ .

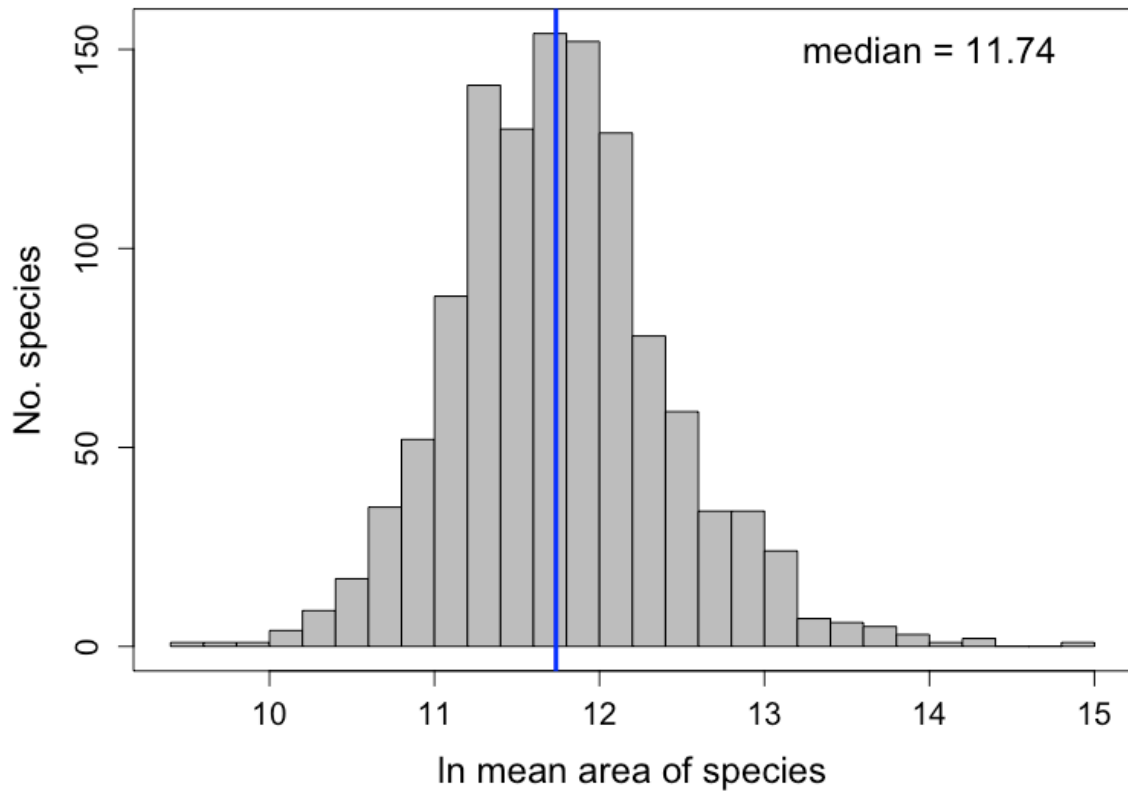

67

68 **Fig. S4. Autozoid area over time.** A. Boxplots of mean  $\ln$  area  $\mu\text{m}^2$  of cheilostome species  
 69 sampled within international geological stages. B. The same data for 11 million year (myr)  
 70 time intervals equivalent to one of the defaults used by the Paleobiology Database. As in  
 71 main text Fig. 2, boxes show interquartile ranges (IQR) while whiskers extend to 1.5 times  
 72 IQR. Grey open circles are individual species means. Numbers above the boxes are the  
 73 number of species represented in the given time interval. The red lines are the grand median  
 74 while the blue lines are the grand means.

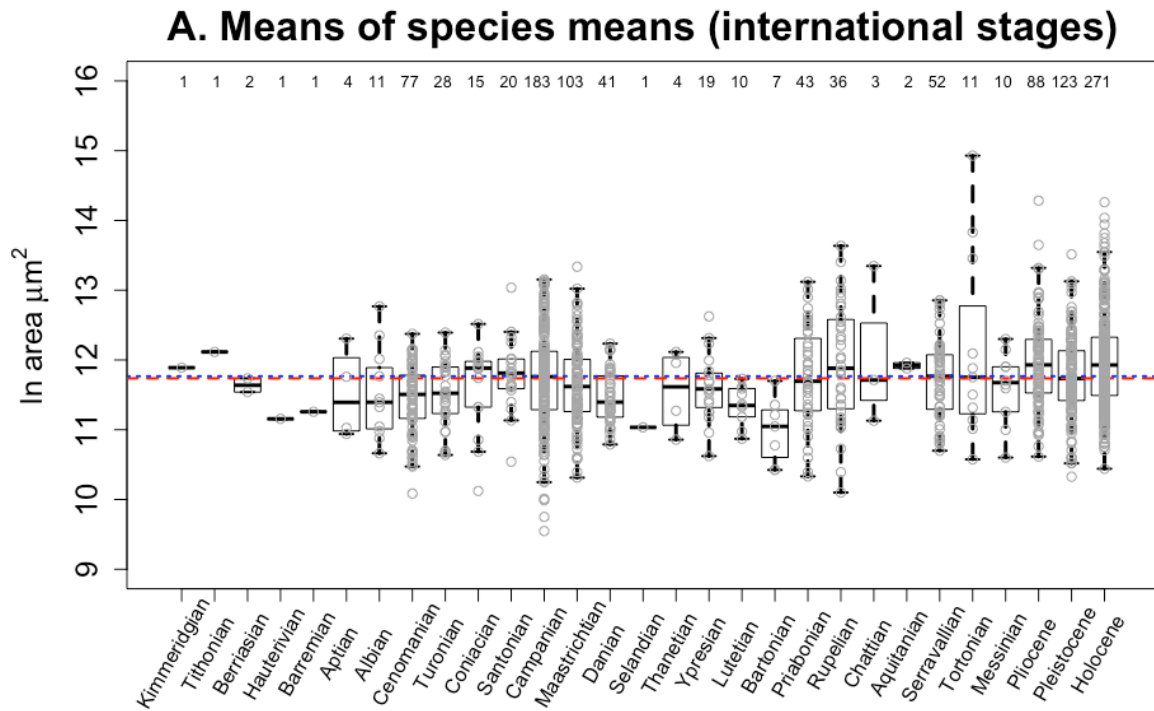

76

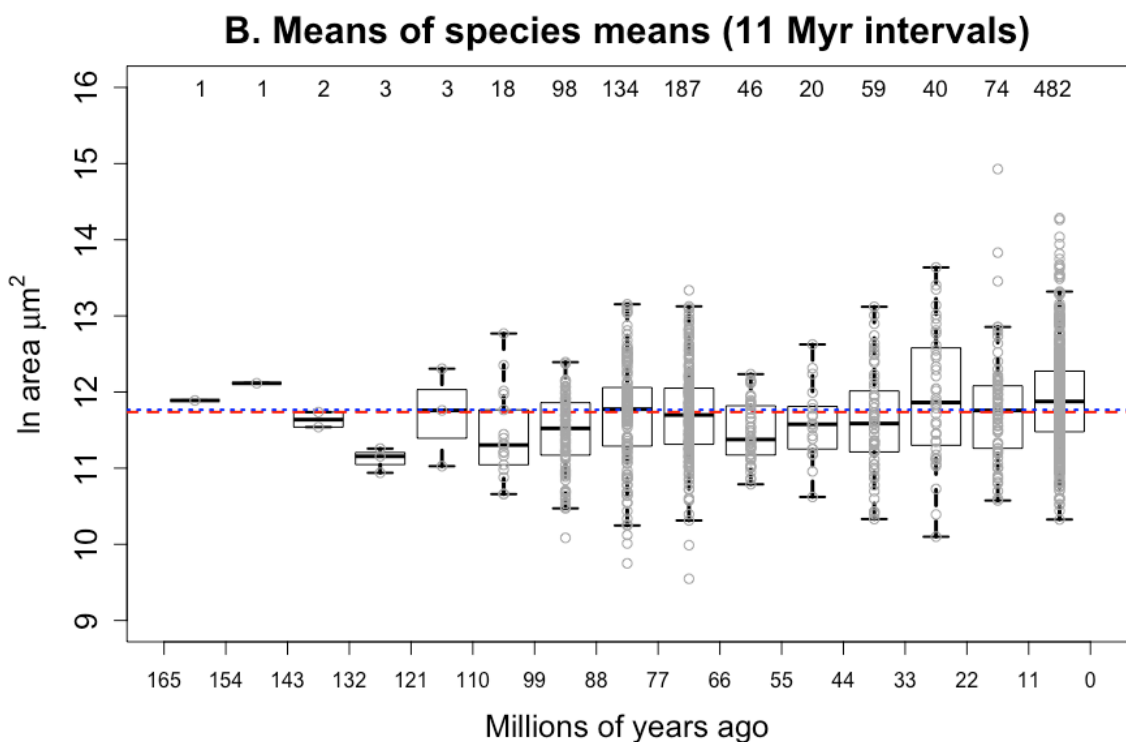

77

78 **Table S1. Phenotypic change model weights.** The first column indicates the models used.  
79 The column ‘10-million-year bins’ shows model weights for data where the ln zooid area  
80 data are averaged in evenly spaced 10-million-year bins (data as in main text Fig. 2). The  
81 column ‘Stages bins’ shows model weights for data where the ln zooid area are averaged in  
82 international geological stages (as in Fig. S4A). The column ‘11-million year bins’ shows  
83 model weights for data where the ln zooid area data are averaged in evenly spaced 11-  
84 million-year bins (data as in Fig. S4B). The column ‘Runs’ shows means (and standard  
85 deviations in parentheses) of 1000 model weights when ages of species are drawn from the  
86 duration of the geological stage they were found in (see main text). The best models are in  
87 bold.

88  
89

| <b>Models</b>                    | <b>10-million-<br/>year<br/>bins</b> | <b>International<br/>stages</b> | <b>11-million-<br/>year<br/>bins</b> | <b>Runs</b>             |
|----------------------------------|--------------------------------------|---------------------------------|--------------------------------------|-------------------------|
| Unbiased Random Walk<br>(URW)    | 0.090                                | 0.003                           | 0.193                                | <b>0.342</b><br>(0.169) |
| Generalized Random Walk<br>(GRW) | 0.031                                | 0.001                           | 0.067                                | 0.119<br>(0.575)        |
| Stasis                           | <b>0.571</b>                         | <b>0.812</b>                    | <b>0.712</b>                         | 0.249<br>(0.204)        |
| Strict Stasis (SS)               | 0                                    | 0                               | 0                                    | 0<br>(0)                |
| Ornstein Uhlenbeck model<br>(OU) | 0.309                                | 0.185                           | 0.028                                | 0.288<br>(0.233)        |

90

91 **Fig. S5. Average probabilities of larger descendants within genera.** Each point (jittered to  
92 show overlapping points) plots the average binomial probability of having larger descendants  
93 in putative AD pairs in a genus, versus the number of species available for comparisons  
94 within that genus. Two of the most data-rich genera are labeled.

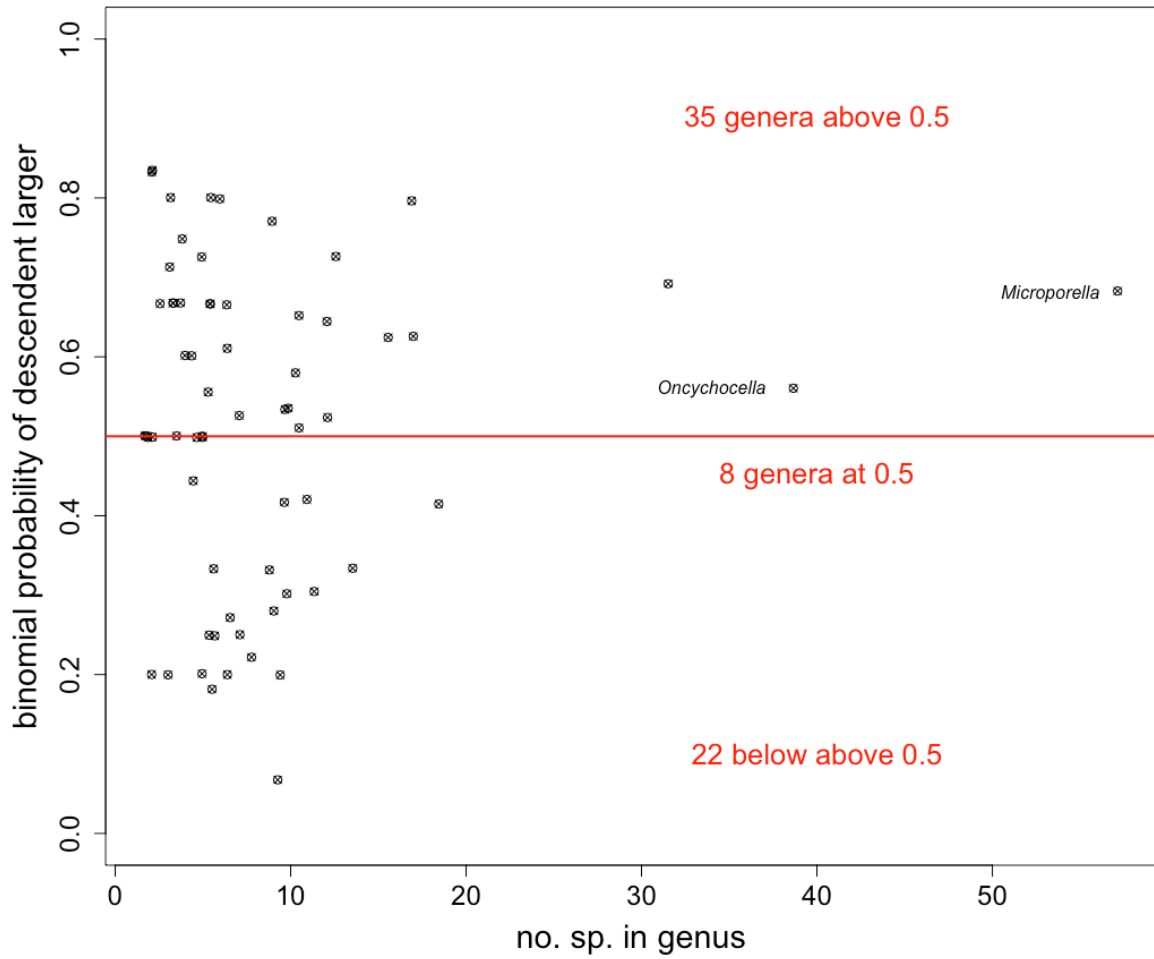

95

96 **Table S2 A comparison of basic random effects models.** Comparing four different random  
 97 effects models indicated in the first column indicated using R notation. The columns are  
 98 degree of difference (df), Akaike Information Criteria (AIC), followed by estimates for the  
 99 fixed effect of log zooid area and standard error in parentheses, then random effect variances  
 100 for species, repeat measurements in species, time (geologic stages) and residuals. Note that  
 101 the third model includes time as fixed effects (hence the cell for random effects is empty).  
 102 The df is 13 rather than 19 for the third model because some time intervals have no repeat  
 103 measurements and are hence dropped from the analyses. Note that these analyses is based  
 104 only on the colonies that have repeat measurements. The bold model is the best but the model  
 105 with double asterisks is what will be used (see Table S3).  
 106

| Model                            | df | AIC  | Fixed<br>(area) | Random<br>(species) | Random<br>(repeats) | Random<br>(Time) | Residuals |
|----------------------------------|----|------|-----------------|---------------------|---------------------|------------------|-----------|
| <b>~ (1 species/repeat)</b>      | 5  | -758 | 11.72<br>(0.10) | 0.708               | 0.016               | NA               | 0.0041    |
| ~ (1   species)**                | 3  | -365 | 11.72<br>(0.10) | 0.712               | NA                  | NA               | 0.0163    |
| ~ Time +<br>(1   species )       | 13 | -381 | 11.46<br>(0.17) | 0.415               | NA                  |                  | 0.0163    |
| ~ (1   Time) +<br>(1   species ) | 4  | -368 | 11.81<br>(0.23) | 0.509               | NA                  | 0.419            | 0.0163    |

107  
 108

109 **Table S3 A comparison of mixed models including paleolatitude and growth forms.**  
 110 Comparing five different random effects are indicated using R notation (first column). The  
 111 five rows under “two colony forms” include only the most common forms, namely encrusting  
 112 sheet (N= 854) and erect colonies (N = 249). The five rows under “four colony forms”  
 113 include also encrusting runners (N = 31) and free-living colonies (N = 33). The columns are  
 114 degree of difference (df), Akaike Information Criteria (AIC). Note that this analysis is based  
 115 only all colonies that can be assigned to a latitude. The bold model is the best one in each  
 116 case, as also confirmed by an Anova analysis.  
 117

| Model                                                          | df | AIC |
|----------------------------------------------------------------|----|-----|
| <b>Two colony forms</b>                                        |    |     |
| ~ (1   Time) +(1   species)                                    | 4  | 291 |
| ~ Form+(1   Time) +( (1   species)                             | 5  | 291 |
| <b>~PaleoLat+(1   Time) +( (1   species)<sup>§,+</sup></b>     | 5  | 258 |
| ~PaleoLat +Form+(1   Time) +( (1   species) <sup>§</sup>       | 6  | 244 |
| ~PaleoLat *Form+(1   Time) +( (1   species) <sup>§</sup>       | 6  | 246 |
| <b>Four colony forms</b>                                       |    |     |
| ~ (1   Time) +(1   species)                                    | 4  | 328 |
| ~ Form+(1   Time) +( (1   species)                             | 7  | 311 |
| ~PaleoLat+(1   Time) +( (1   species)                          | 5  | 272 |
| <b>~PaleoLat +Form+(1   Time) +( (1   species)<sup>*</sup></b> | 8  | 264 |
| ~PaleoLat *Form+(1   Time) +( (1   species)                    | 11 | 267 |

118  
 119 <sup>§</sup>These three models have different slightly different AICs but are not significantly different in a  
 120 anova test and hence the simplest model has been highlighted as the overall best model.  
 121

122 <sup>+</sup>Estimates for the **best model from two colony forms data**: zooid size (fixed effect) = 11.20  
 123 (std error = 0.09); latitude (fixed effect) = 0.012 (std error = 0.002); time (random effect  
 124 variance) = 0.035 (std. dev = 0.18); species (random effect variance) = 0.37 (std. dev = 0.61);  
 125 residual variance = 0.015 (std. dev = 0.12)  
 126

127 <sup>\*</sup> Estimates for the **best model from four colony forms data**: zooid size (fixed effect) = 11.20  
 128 (std error = 0.09); latitude (fixed effect) = 0.012 (std error = 0.002); Free-living (fixed effect)  
 129 = -0.40 (std. error = 0.12); Runner (fixed effect) = -0.03 (std. error = 0.12); Encrusting Sheet  
 130 (fixed effect) = 0.04 (std. error = 0.05) time (random effect variance) = 0.031 (std. dev =  
 131 0.18); species (random effect variance) = 0.37 (std. dev = 0.61); residual variance = 0.015  
 132 (std. dev = 0.12). Hence, encrusting sheets are have marginally larger zooids than erect  
 133 colonies while runners and free-living forms have somewhat smaller zooids than erect  
 134 colonies.



135 **Table S4. A comparison of mixed models for change in area from ancestor to**  
 136 **descendent.** Comparing three different random effects models indicated in the first column  
 137 indicated using R notation, where shift indicates the change in latitude and abs.time.diff is the  
 138 absolute difference in time between the putative ancestor and descendent (using estimates to  
 139 the closest million years). The columns are degree of difference (df), Akaike Information  
 140 Criteria (AIC), followed by estimates for the fixed effects of change in log zooid area and  
 141 standard error in parenthesis, shift in (paleo)latitude, and absolute time difference between  
 142 ancestor and descendent followed by genus random effects and the residuals. The bold model  
 143 is the best one.  
 144

| Model                              | df | AIC  | Fixed<br>(change<br>in area) | Fixed<br>(shift in<br>latitude) | Fixed<br>(time<br>transpired) | Random<br>(Genus) | Residual |
|------------------------------------|----|------|------------------------------|---------------------------------|-------------------------------|-------------------|----------|
| <b>~(1 genus)</b>                  | 3  | 8064 | -0.061<br>(0.029)            |                                 |                               | 0.04              | 0.44     |
| ~shift+(1 genus)                   | 4  | 8065 | -0.060<br>(0.029)            | 0.0005<br>(0.0006)              |                               | 0.04              | 0.44     |
| ~shift+(1 genus)+<br>abs.time.diff | 5  | 8067 | - 0.061<br>(0.030)           | 0.0005<br>(0.0007)              | 2.96e-06<br>(5.98e-04)        | 0.04              | 0.44     |

145  
 146  
 147

148 **Fig. S6. Shift in latitude versus change in ln zooid size (from Ancestor to Descendent).**  
149 Each point represents a putative AD pair. The blue line is the null hypothesis, while the  
150 dotted red line is the estimated fit from the second model in Table S4. These are  
151 indistinguishable.

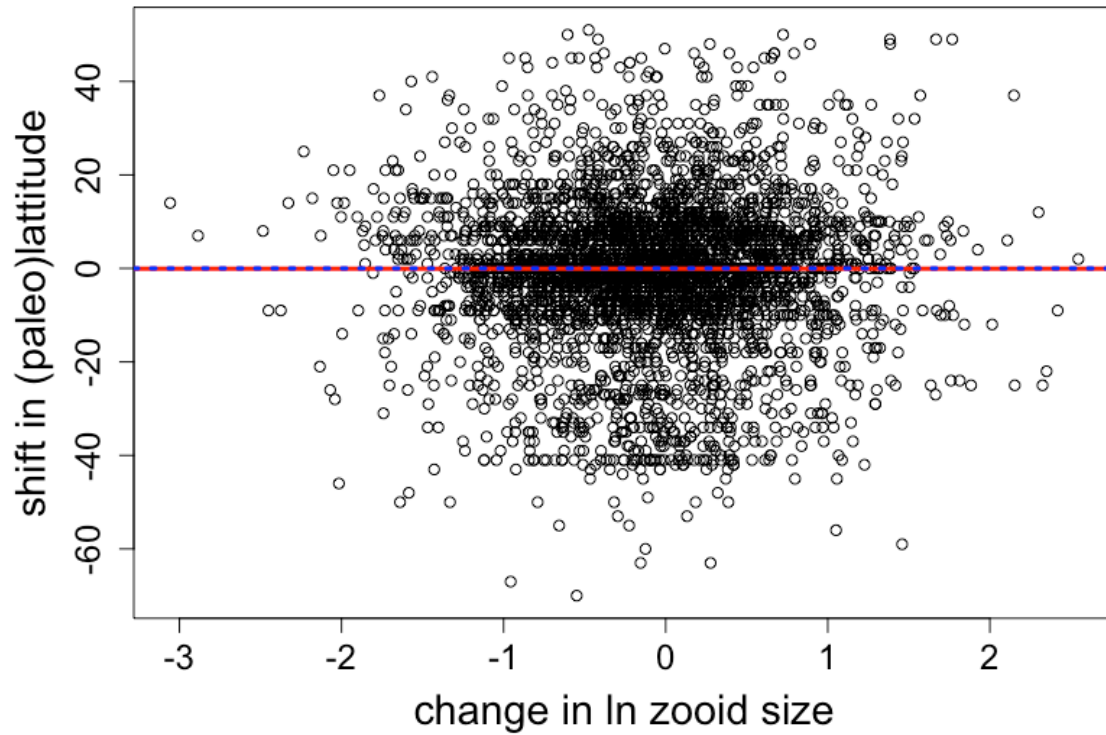

152
